# Supplementary material
Source: ML conference proceedings conference paper supplement (https://openaccess.thecvf.com/content/CVPR2026/html/Jeong_Learning_to_Act_CVPR_2026_paper.html)
Supplement: Supplementary file 1 [file Jeong_Learning_to_Act_CVPR_2026_supplemental.pdf]

# Learning to Act Robustly with View-Invariant Latent Actions

## Supplementary Material

### A. Implementation Details

We provide the implementation details used for view generation, NVS generation, VILA training, baselines and diffusion policy training.

#### A.1. View Configurations

For reproducibility, Tables 1 and 2 list the exact world-frame camera poses (positions and MuJoCo quaternions) for all views used in this paper.

#### A.2. ZeroNVS Configurations

We utilized the official open-source implementation of ZeroNVS<sup>1</sup> and the pretrained checkpoint to generate novel views in our real-world experiments using SO-ARM101. The hyperparameters for this process are summarized in Table 3. We created 26 more combinations of novel views of our dataset and selected 4 views of azimuth, vertical and optical axis translation of (0.0°, -5cm, 5cm), (5°, 0cm, -5cm), (-5°, 5cm, 0cm) and the original data representing (0.0°, 0.0cm, 0.0cm) to cover all variations of each axis.

#### A.3. VILA Configurations

We train VILA with a two-stage pipeline: (i) latent action pre-training from multi-view videos, and (ii) latent behavior cloning in the learned latent space. Unless otherwise specified, we use a single configuration across all datasets and tasks, summarized in Table 4.

#### A.4. Baseline Implementations

**CLASS.** We adapt CLASS from official open-source implementation<sup>2</sup> to our setting by applying its contrastive objective on top of our Stage-1 encoder, using the same image resolution and latent dimension as VILA.

**ReViWo.** For ReViWo, we follow the official implementation<sup>3</sup> and adjust its input image size and latent dimensionality to match VILA. Because ReViWo is ViT-based and outputs patch tokens, we choose the token and hidden dimensions so that the resulting representation has the same dimensionality as VILA, ensuring a fair comparison across methods.

**VLAs.** For the real-world VLA baselines, we fine-tune the models on the ZeroNVS-augmented dataset starting

<sup>1</sup><https://github.com/kylesargent/ZeroNVS>

<sup>2</sup><https://github.com/sean1295/CLASS>

<sup>3</sup><https://github.com/Trevor-emt/Reviwo>

| View    | $x$    | $y$     | $z$    | $q_w$  | $q_x$  | $q_y$  | $q_z$  |
|---------|--------|---------|--------|--------|--------|--------|--------|
| View 00 | 0.0981 | -0.4091 | 1.4249 | 0.9451 | 0.3051 | 0.0361 | 0.1117 |
| View 01 | 0.2021 | -0.4080 | 1.3951 | 0.9159 | 0.3304 | 0.0773 | 0.2144 |
| View 02 | 0.0473 | -0.4811 | 1.3677 | 0.9293 | 0.3662 | 0.0180 | 0.0456 |
| View 03 | 0.0204 | -0.5587 | 1.2741 | 0.8937 | 0.4483 | 0.0082 | 0.0163 |
| View 04 | 0.2175 | -0.5482 | 1.2234 | 0.8577 | 0.4786 | 0.0915 | 0.1639 |
| View 05 | 0.2523 | -0.3380 | 1.4240 | 0.9029 | 0.2925 | 0.0971 | 0.2998 |
| View 06 | 0.3973 | -0.1771 | 1.4131 | 0.7947 | 0.2686 | 0.1743 | 0.5157 |
| View 07 | 0.3278 | -0.3572 | 1.3663 | 0.8665 | 0.3429 | 0.1335 | 0.3374 |
| View 08 | 0.3985 | -0.3722 | 1.2939 | 0.8271 | 0.3965 | 0.1722 | 0.3592 |
| View 09 | 0.4504 | -0.3576 | 1.2489 | 0.7957 | 0.4215 | 0.2036 | 0.3843 |
| View 10 | 0.3738 | 0.0263  | 1.4587 | 0.6572 | 0.1817 | 0.1950 | 0.7051 |
| View 11 | 0.4394 | -0.0577 | 1.4061 | 0.7102 | 0.2465 | 0.2162 | 0.6230 |
| View 12 | 0.5130 | -0.0142 | 1.3349 | 0.6579 | 0.2846 | 0.2769 | 0.6400 |
| View 13 | 0.5352 | -0.1022 | 1.2945 | 0.6950 | 0.3327 | 0.2752 | 0.5749 |
| View 14 | 0.5651 | 0.0328  | 1.2635 | 0.6105 | 0.3135 | 0.3322 | 0.6470 |
| View 15 | 0.2890 | 0.2414  | 1.4574 | 0.4081 | 0.1136 | 0.2428 | 0.8727 |
| View 16 | 0.4437 | 0.1645  | 1.3781 | 0.5336 | 0.2036 | 0.2926 | 0.7669 |
| View 17 | 0.3112 | 0.4094  | 1.3336 | 0.2929 | 0.1271 | 0.3773 | 0.8693 |
| View 18 | 0.4612 | 0.2553  | 1.3178 | 0.4627 | 0.2092 | 0.3549 | 0.7850 |
| View 19 | 0.4271 | 0.3932  | 1.2399 | 0.3535 | 0.1908 | 0.4350 | 0.8059 |
| View 20 | 0.2071 | 0.3366  | 1.4443 | 0.2611 | 0.0775 | 0.2737 | 0.9225 |
| View 21 | 0.2687 | 0.3871  | 1.3800 | 0.2793 | 0.1059 | 0.3384 | 0.8923 |
| View 22 | 0.2279 | 0.4535  | 1.3414 | 0.2124 | 0.0903 | 0.3806 | 0.8955 |
| View 23 | 0.2285 | 0.4949  | 1.2941 | 0.1935 | 0.0927 | 0.4220 | 0.8808 |
| View 24 | 0.1605 | 0.5482  | 1.2553 | 0.1258 | 0.0657 | 0.4585 | 0.8773 |

Table 1. **Exact Camera Poses for the 25 Main Views.** Positions are given in the world frame (MuJoCo’s default metric units, i.e., meters), and orientations are MuJoCo quaternions ( $q_w, q_x, q_y, q_z$ ).

| View          | $x$    | $y$    | $z$    | $q_w$  | $q_x$  | $q_y$  | $q_z$  |
|---------------|--------|--------|--------|--------|--------|--------|--------|
| Extra View 00 | 0.2902 | 0.0585 | 1.5040 | 0.6269 | 0.1256 | 0.1568 | 0.7527 |
| Extra View 01 | 0.3111 | 0.0577 | 1.4936 | 0.6240 | 0.1391 | 0.1672 | 0.7505 |
| Extra View 02 | 0.3316 | 0.0570 | 1.4825 | 0.6209 | 0.1525 | 0.1776 | 0.7481 |
| Extra View 03 | 0.2880 | 0.0686 | 1.5040 | 0.6137 | 0.1228 | 0.1590 | 0.7635 |
| Extra View 04 | 0.3294 | 0.0686 | 1.4825 | 0.6078 | 0.1494 | 0.1803 | 0.7588 |
| Extra View 05 | 0.2854 | 0.0786 | 1.5040 | 0.6003 | 0.1200 | 0.1611 | 0.7741 |
| Extra View 06 | 0.3063 | 0.0793 | 1.4936 | 0.5975 | 0.1331 | 0.1720 | 0.7718 |
| Extra View 07 | 0.3268 | 0.0800 | 1.4825 | 0.5945 | 0.1462 | 0.1829 | 0.7693 |

Table 2. **Exact Camera Poses for the Extrapolated Views.** Positions are given in the world frame (MuJoCo’s default metric units, i.e., meters), and orientations are MuJoCo quaternions ( $q_w, q_x, q_y, q_z$ ).

from the pretrained checkpoints `lerobot/pi0.5_base` and `lerobot/smolvla_base`. We use implementations from LeRobot<sup>4</sup> and the main hyperparameters are summarized in Table 7.

#### A.5. Diffusion Policy Configurations

For simulation experiments, we used the official open-source implementation<sup>5</sup> of diffusion policy in Robomimic [1]. The main hyperparameters are summarized in Table 5. All methods (ours and baselines) use the same diffusion-policy architecture and training settings.

<sup>4</sup><https://github.com/huggingface/lerobot>

<sup>5</sup><https://github.com/ARISE-Initiative/robomimic>

Table 3. **ZeroNVS Hyperparameters.** Configuration for ZeroNVS for real-world data augmentation.

| Hyperparameter       | Value              |
|----------------------|--------------------|
| Noise Scheduler      | DDIM               |
| Inference Steps      | 50                 |
| Guidance Scale       | 7.5                |
| FOV deg              | 13.0°              |
| Default Elevation    | -10.0°             |
| Default Azimuth      | 0.0°               |
| Default Distance     | 1.0m               |
| Translation Azimuth  | {-5.0, 0.0, 5.0}°  |
| Translation Vertical | {-5.0, 0.0, 5.0}cm |
| Translation Optical  | {-5.0, 0.0, 5.0}cm |

Table 4. **VILA Training Hyperparameters.** We use a two-stage training pipeline: Stage 1 latent action pre-training and Stage 2 latent behavior cloning.

| Hyperparameter                             | Value                                                |
|--------------------------------------------|------------------------------------------------------|
| <b>Stage 1: Latent Action Pre-training</b> |                                                      |
| Optimizer                                  | AdamW                                                |
| Learning Rate                              | $1 \times 10^{-4}$                                   |
| Latent Dimension ( $D_z$ )                 | 128 (sim.), 512 (real-world)                         |
| Prediction Horizon ( $K$ )                 | $1 \sim 10$                                          |
| Time Indices per Batch ( $N$ )             | 16                                                   |
| Views per Batch ( $V$ )                    | 8                                                    |
| Image Resolution                           | $64 \times 64$ (sim.), $128 \times 128$ (real-world) |
| Distance Type                              | $L_2$                                                |
| InfoNCE Temperature ( $\tau$ )             | 1.0                                                  |
| $\lambda_1$ ( $\mathcal{L}_{w-NCE}$ )      | 1.0                                                  |
| $\lambda_2$ ( $\mathcal{L}_{struct}$ )     | 1.0                                                  |
| Weighting Temperature ( $\beta$ )          | 0.001                                                |
| Epochs                                     | 100                                                  |
| Gradient Clipping Norm                     | 1.0                                                  |
| Target EMA Coef.                           | 0.001                                                |
| Target Update Interval (Epochs)            | 1                                                    |
| IDM Head Hidden Dim.                       | 1024                                                 |
| FDM Head Hidden Dim.                       | 1024                                                 |
| <b>Stage 2: Latent Behavior Cloning</b>    |                                                      |
| Optimizer                                  | AdamW                                                |
| Learning Rate                              | $5 \times 10^{-5}$                                   |
| BC Batch Size                              | 256                                                  |
| Prediction Horizon ( $K$ )                 | 10                                                   |
| Image Resolution                           | $64 \times 64$                                       |
| Epochs                                     | 100                                                  |

## B. Additional Experimental Results

### B.1. Failure Cases

Figure 1 shows representative failures in simulation and the real world. The dominant failure mode is object mislocalization, with occasional grasp failures in simulation. In the real-world experiments, we only observed mislocalization failures. These examples indicate that errors under viewpoint shifts are largely due to localization.

Table 5. **Diffusion Policy Hyperparameters for Simulations.** Configuration for the diffusion policy used for policy training in simulations.

| Hyperparameter                               | Value              |
|----------------------------------------------|--------------------|
| Learning Rate                                | $1 \times 10^{-4}$ |
| Encoder Learning Rate (In Fine-tune Setting) | $1 \times 10^{-5}$ |
| Optimizer                                    | AdamW              |
| Optimizer Scheduler                          | Cosine             |
| Training Epochs (In Fine-tune setting)       | 50                 |
| Training Epochs (In Frozen setting)          | 100                |
| Steps per Epoch                              | 1,000              |
| Warmup Steps                                 | 500                |
| Batch Size (for Lift)                        | 100                |
| Batch Size (for others)                      | 1,000              |
| Image Resolution                             | $64 \times 64$     |
| Observation Horizon                          | 1                  |
| Prediction Horizon                           | 16                 |
| Action Horizon                               | 8                  |
| Noise Scheduler                              | DDIM               |
| Beta Scheduler                               | squaredcos_cap.v2  |
| Diffusion Training Steps                     | 100                |
| Diffusion Inference Steps                    | 10                 |

Table 6. **Diffusion Policy Hyperparameters for Real-World.** Configuration for the Diffusion Policy for policy finetuning in real-world experiments.

| Hyperparameter            | Value              |
|---------------------------|--------------------|
| Learning Rate             | $1 \times 10^{-4}$ |
| Encoder Learning Rate     | $1 \times 10^{-5}$ |
| Optimizer                 | AdamW              |
| Optimizer Scheduler       | Cosine             |
| Training Steps            | 200,000            |
| Warmup Steps              | 500                |
| Batch Size                | 64                 |
| Image Resolution          | $128 \times 128$   |
| Observation Horizon       | 2                  |
| Prediction Horizon        | 16                 |
| Action Horizon            | 16                 |
| Noise Scheduler           | DDIM               |
| Beta scheduler            | squaredcos_cap.v2  |
| Diffusion Training Steps  | 100                |
| Diffusion Inference Steps | 10                 |

Table 7. **VLA Hyperparameters for Real World.** Configuration for the VLAs for policy finetuning in real-world experiments.

| Hyperparameter      | $\pi_{0.5}$          | SmolVLA            |
|---------------------|----------------------|--------------------|
| Learning Rate       | $2.5 \times 10^{-5}$ | $1 \times 10^{-4}$ |
| Optimizer           | AdamW                | AdamW              |
| Optimizer Scheduler | Cosine               | Cosine             |
| Training Steps      | 30,000               | 200,000            |
| Warmup Steps        | 1,000                | 1,000              |
| Batch Size          | 32                   | 64                 |
| Image Resolution    | $224 \times 224$     | $512 \times 512$   |
| Observation Horizon | 1                    | 1                  |
| Prediction Horizon  | 50                   | 50                 |
| Action Horizon      | 50                   | 50                 |
| FM Inference Steps  | 10                   | 10                 |

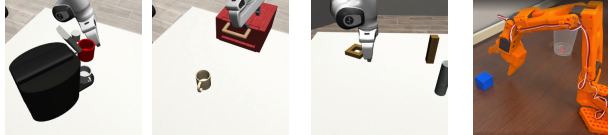

(a) Sim: Misloc. (b) Sim: Misloc. (c) Sim: Grasp Fail (d) Real: Misloc.

Figure 1. **Representative failure cases.** The dominant failure mode is object mislocalization in both simulation and the real world, with occasional grasp failures observed in simulation.

## B.2. RGB-D Inputs

We also evaluate RGB-D inputs on the Lift task. Adding depth improves Vanilla from 77.0% to 80.7% unseen-view success, while VILA+RGB-D further improves from 94.7% to 95.3%. This suggests that the proposed objective remains useful and complementary even when depth information is available.

## B.3. Entropy Results

Tables 8–11 report the same view and action entropy metrics on the remaining tasks (Square, Stack Three, Coffee, and Mug Cleanup). Across all four datasets, we observe the same qualitative trend as in Lift: VILA consistently attains the highest view entropy on both seen and unseen views, while achieving the lowest action entropy among all methods, both before and after policy fine-tuning.

Table 8. **View and Action Entropy (Square).** Entropy-based analysis of representation quality before and after policy fine-tuning in the Square dataset. “Seen” and “Unseen” denote view entropies (higher is better,  $\uparrow$ ) computed over the 25 views, while “Action” denotes action entropy (lower is better,  $\downarrow$ ) based on 10 clustered action classes. The upper-bound row corresponds to the entropy of a uniform distribution over 25 views (Seen/Unseen) and 10 action clusters (Action).

| Model                     | Seen ( $\uparrow$ ) | Unseen ( $\uparrow$ ) | Action ( $\downarrow$ ) |
|---------------------------|---------------------|-----------------------|-------------------------|
| Upper Bound               | 3.219               | 3.219                 | 2.303                   |
| <b>Before Fine-tuning</b> |                     |                       |                         |
| VILA (Ours)               | <b>2.894</b>        | <b>2.705</b>          | <b>0.631</b>            |
| CLASS                     | 2.607               | 1.982                 | 0.861                   |
| ReViWo                    | 2.325               | 1.748                 | 1.316                   |
| <b>Fine-Tuned</b>         |                     |                       |                         |
| VILA (Ours)               | <b>2.917</b>        | <b>2.712</b>          | <b>0.598</b>            |
| Vanilla                   | 2.607               | 1.982                 | 0.802                   |
| CLASS                     | 2.449               | 1.57                  | 0.912                   |
| ReViWo                    | 2.443               | 1.776                 | 1.384                   |
| KYC                       | 1.653               | 1.143                 | 1.361                   |

Table 9. **View and Action Entropy (Stack Three).** Entropy-based analysis of representation quality before and after policy fine-tuning in the Stack Three dataset. “Seen” and “Unseen” denote view entropies (higher is better,  $\uparrow$ ) computed over the 25 views, while “Action” denotes action entropy (lower is better,  $\downarrow$ ) based on 10 clustered action classes. The upper-bound row corresponds to the entropy of a uniform distribution over 25 views (Seen/Unseen) and 10 action clusters (Action).

| Model                     | Seen ( $\uparrow$ ) | Unseen ( $\uparrow$ ) | Action ( $\downarrow$ ) |
|---------------------------|---------------------|-----------------------|-------------------------|
| Upper Bound               | 3.219               | 3.219                 | 2.303                   |
| <b>Before Fine-tuning</b> |                     |                       |                         |
| VILA (Ours)               | <b>3.111</b>        | <b>3.096</b>          | <b>0.362</b>            |
| CLASS                     | 2.950               | 2.826                 | 0.463                   |
| ReViWo                    | 2.592               | 2.303                 | 1.232                   |
| <b>Fine-Tuned</b>         |                     |                       |                         |
| VILA (Ours)               | <b>3.076</b>        | <b>3.046</b>          | <b>0.339</b>            |
| Vanilla                   | 2.986               | 2.883                 | 0.488                   |
| CLASS                     | 2.886               | 2.723                 | 0.546                   |
| ReViWo                    | 2.667               | 2.341                 | 1.180                   |
| KYC                       | 2.118               | 2.073                 | 1.053                   |

Table 10. **View and Action Entropy (Coffee).** Entropy-based analysis of representation quality before and after policy fine-tuning in the Coffee dataset. “Seen” and “Unseen” denote view entropies (higher is better,  $\uparrow$ ) computed over the 25 views, while “Action” denotes action entropy (lower is better,  $\downarrow$ ) based on 10 clustered action classes. The upper-bound row corresponds to the entropy of a uniform distribution over 25 views (Seen/Unseen) and 10 action clusters (Action).

| Model                     | Seen ( $\uparrow$ ) | Unseen ( $\uparrow$ ) | Action ( $\downarrow$ ) |
|---------------------------|---------------------|-----------------------|-------------------------|
| Upper Bound               | 3.219               | 3.219                 | 2.303                   |
| <b>Before Fine-tuning</b> |                     |                       |                         |
| VILA (Ours)               | <b>2.554</b>        | <b>1.924</b>          | <b>0.487</b>            |
| CLASS                     | 2.361               | 1.075                 | 0.700                   |
| ReViWo                    | 2.182               | 1.181                 | 1.053                   |
| <b>Fine-Tuned</b>         |                     |                       |                         |
| VILA (Ours)               | <b>2.426</b>        | <b>1.632</b>          | <b>0.488</b>            |
| Vanilla                   | 2.204               | 0.809                 | 0.710                   |
| CLASS                     | 0.995               | 0.287                 | 0.812                   |
| ReViWo                    | 2.201               | 1.429                 | 1.222                   |
| KYC                       | 1.274               | 0.457                 | 1.010                   |

## B.4. UMAP Visualization

**UMAP plots.** In Figures 2–6, we visualize encoder representations across the 25 camera views with UMAP [2] on Lift, Square, Stack-Three, Coffee, and Mug-Cleanup. For baselines, unseen views (especially Views 10–14) form separate clusters, whereas VILA intermingles them with seen views. This pattern matches our entropy analysis that VILA

Table 11. **View and Action Entropy (Mug Cleanup)**. Entropy-based analysis of representation quality before and after policy fine-tuning in the Mug Cleanup dataset. “Seen” and “Unseen” denote view entropies (higher is better,  $\uparrow$ ) computed over the 25 views, while “Action” denotes action entropy (lower is better,  $\downarrow$ ) based on 10 clustered action classes. The upper-bound row corresponds to the entropy of a uniform distribution over 25 views (Seen/Unseen) and 10 action clusters (Action).

| Model                     | Seen ( $\uparrow$ ) | Unseen ( $\uparrow$ ) | Action ( $\downarrow$ ) |
|---------------------------|---------------------|-----------------------|-------------------------|
| Upper Bound               | 3.219               | 3.219                 | 2.303                   |
| <b>Before Fine-tuning</b> |                     |                       |                         |
| VILA (Ours)               | <b>2.957</b>        | <b>2.891</b>          | <b>0.452</b>            |
| CLASS                     | 2.564               | 2.071                 | 0.654                   |
| ReViWo                    | 2.383               | 1.941                 | 1.161                   |
| <b>Fine-Tuned</b>         |                     |                       |                         |
| VILA (Ours)               | <b>2.920</b>        | <b>2.793</b>          | <b>0.404</b>            |
| Vanilla                   | 2.721               | 2.272                 | 0.614                   |
| CLASS                     | 2.153               | 1.569                 | 0.824                   |
| ReViWo                    | 2.437               | 1.904                 | 1.302                   |
| KYC                       | 1.765               | 1.176                 | 1.142                   |

has the highest view entropy.

**Action-cluster UMAPs.** In Figures 7–11, we reuse the same encoder representations as in the view-based UMAPs, but color them by  $K=10$  action clusters obtained by applying  $k$ -means to 10-step GT action sequences  $\{a_t, \dots, a_{t+9}\}$ .

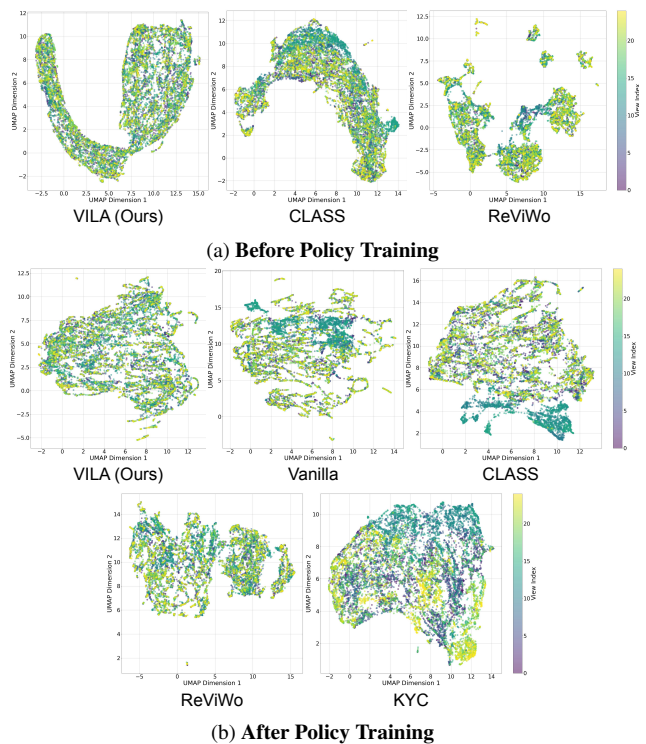

Figure 2. **UMAP of encoder representations across 25 views on Lift.** On Left, baselines show distinct clusters for unseen views (especially for views 10–14), whereas VILA representations are more uniformly mixed across views, indicating stronger view invariance both before and after policy training.

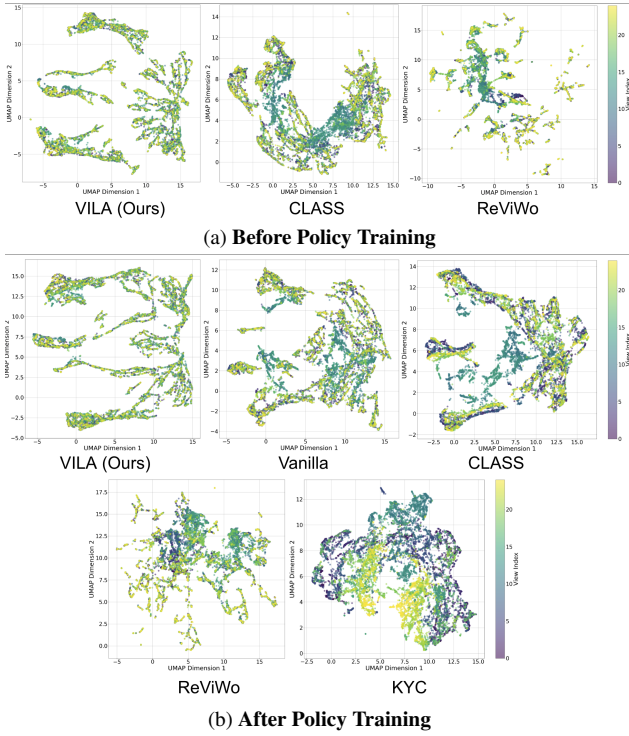

Figure 3. UMAP of encoder representations across 25 views on Square.

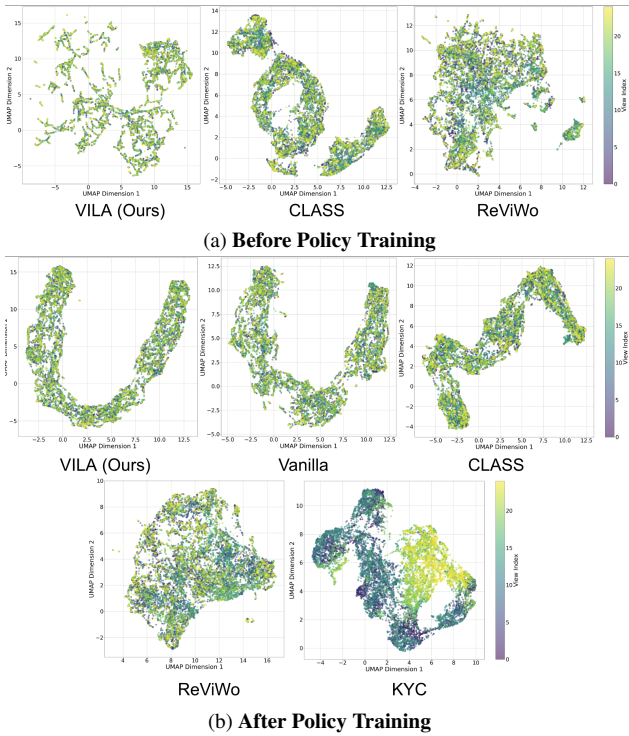

Figure 4. UMAP of encoder representations across 25 views on Stack Three.

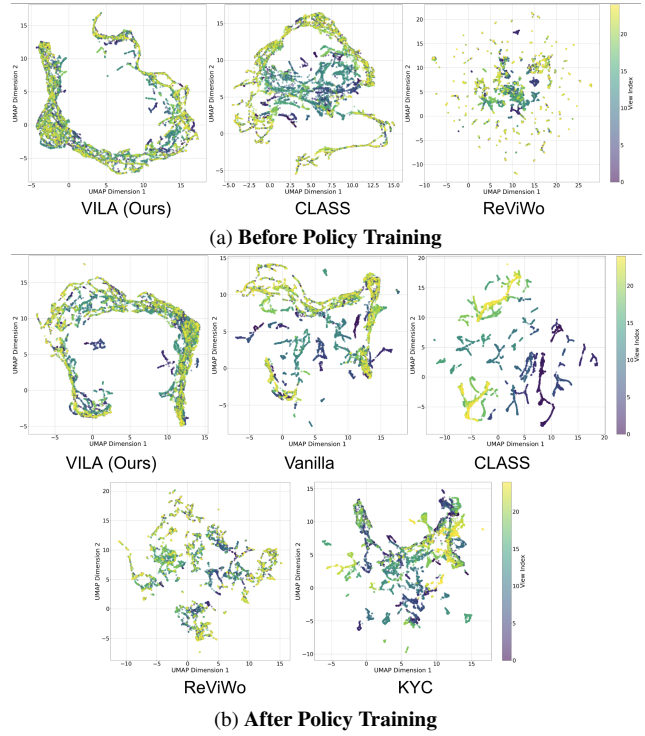

Figure 5. UMAP of encoder representations across 25 views on Coffee.

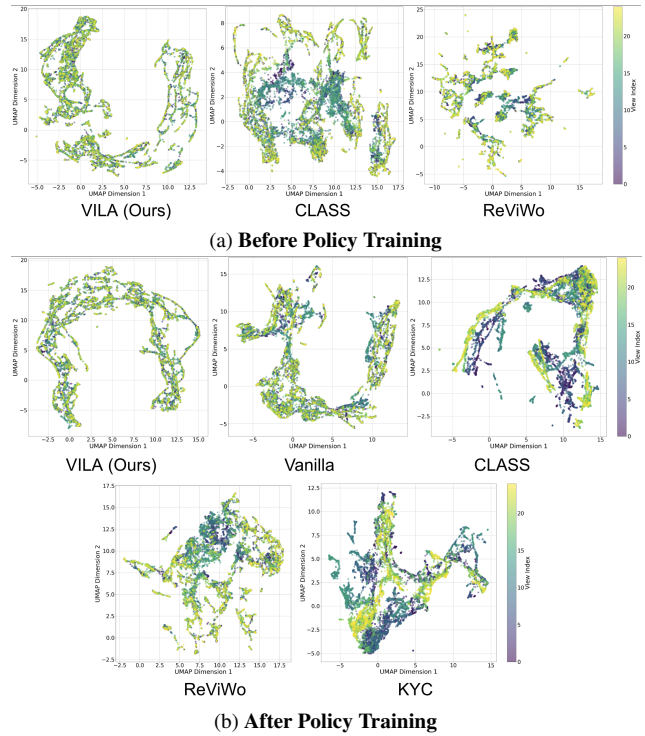

Figure 6. UMAP of encoder representations across 25 views on Mug Cleanup.

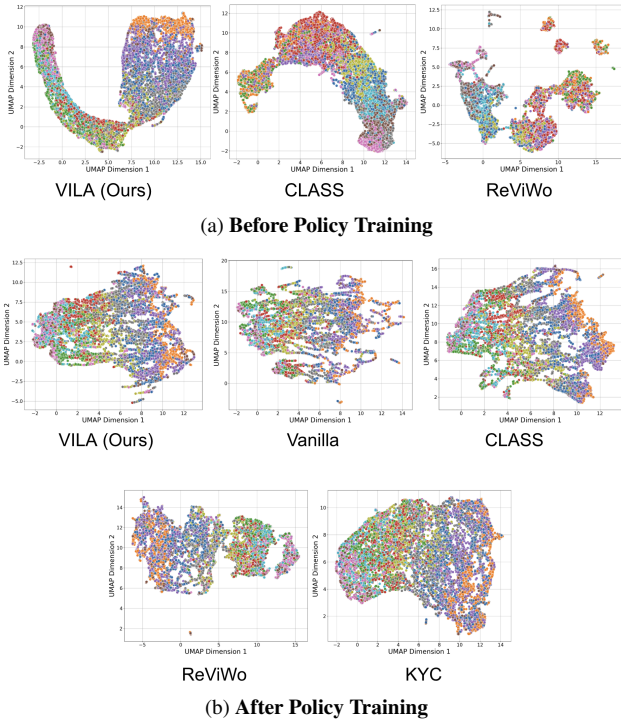

Figure 7. UMAP of encoder representations colored by action clusters on Lift.

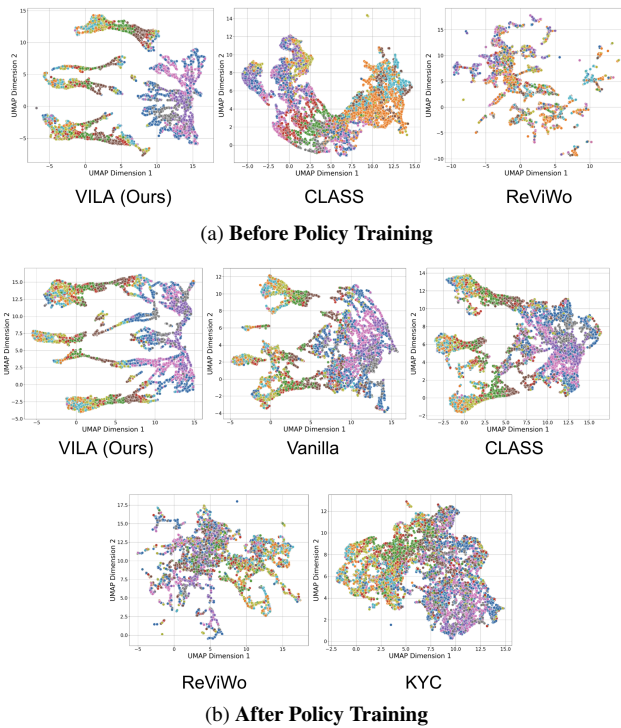

Figure 8. UMAP of encoder representations colored by action clusters on Square.

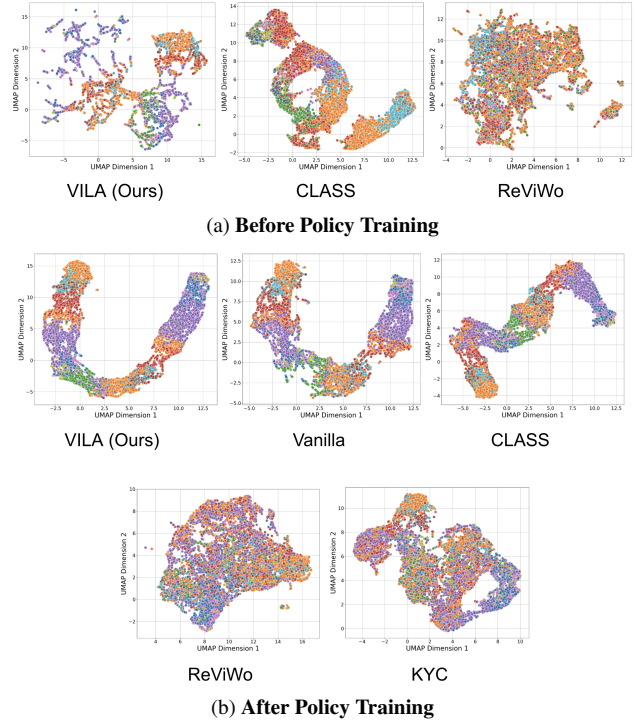

Figure 9. UMAP of encoder representations colored by action clusters on Stack Three.

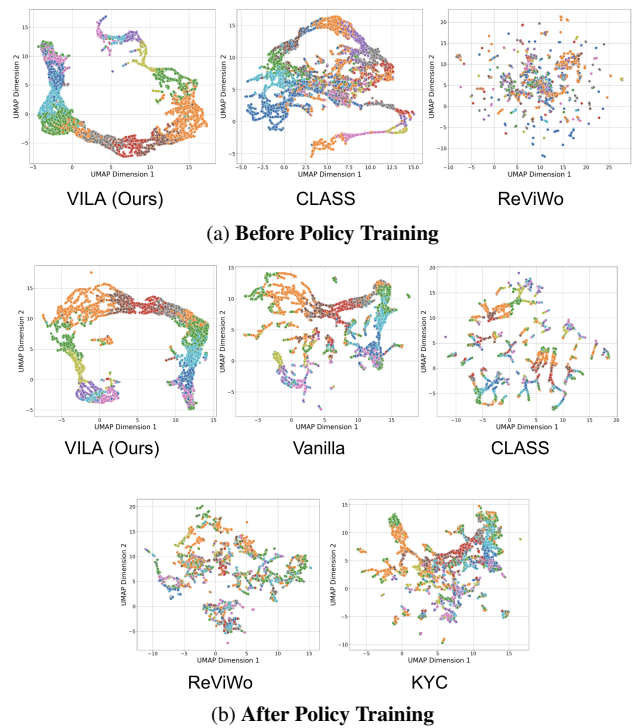

Figure 10. UMAP of encoder representations colored by action clusters on Coffee.

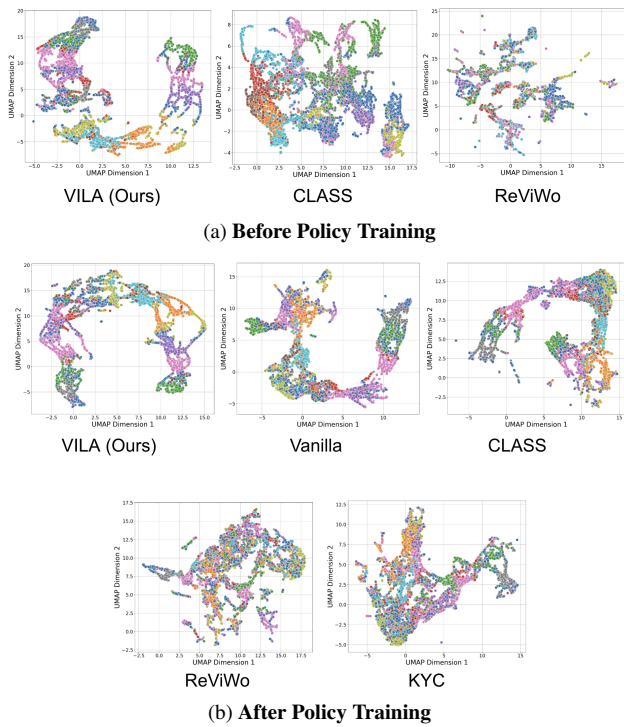

Figure 11. UMAP of encoder representations colored by action clusters on Mug Cleanup.

## References

- [1] Ajay Mandlekar, Danfei Xu, Josiah Wong, Soroush Nasiriany, Chen Wang, Rohun Kulkarni, Li Fei-Fei, Silvio Savarese, Yuke Zhu, and Roberto Martín-Martín. What matters in learning from offline human demonstrations for robot manipulation. In *arXiv preprint arXiv:2108.03298*, 2021. 1
- [2] Leland McInnes, John Healy, and James Melville. Umap: Uniform manifold approximation and projection for dimension reduction, 2020. 3
